# Supplementary material
Source: ML conference proceedings conference paper supplement (https://openaccess.thecvf.com/content/ICCV2025/html/Yu_BoxDreamer_Dreaming_Box_ICCV_2025_paper.html)
Supplement: Supplementary file 1 [file boxdreamer-supp.pdf › boxdreamer-supp.pdf]

# BoxDreamer: Dreaming Box Corners for Generalizable Object Pose Estimation

## Supplementary Material

### 1. YCB-Video Reference Database Construction

Table 1 shows the selected reference video sequences for the YCB-Video dataset [8]. The reference video sequences are chosen based on the following criteria: (1) Most-overlapping: the video contains the most overlapping view-points based on the object coordinates; (2) Occlusion-minimizing: the video sequences with a high overlapping ratio and without obvious occlusions. More specifically, the most overlapping video sequences are automatically selected based on the average angular difference between consecutive frames, with higher average angular differences indicating more overlapping views. The Occlusion-minimizing video sequences are manually selected from the video sequences sorted in descending order by overlapping ratio.

| Objects               | Reference Video Sequence |                      |
|-----------------------|--------------------------|----------------------|
|                       | Most-overlapping         | Occlusion-minimizing |
| 002_master_chef_can   | 0091                     | 0014                 |
| 003_cracker_box       | 0007                     | 0007                 |
| 004_sugar_box         | 0089                     | 0074                 |
| 005_tomato_soup_can   | 0008                     | 0003                 |
| 006_mustard_bottle    | 0008                     | 0008                 |
| 007_tuna_fish_can     | 0008                     | 0039                 |
| 008_pudding_box       | 0070                     | 0076                 |
| 009_gelatin_box       | 0003                     | 0000                 |
| 010_potted_meat_can   | 0008                     | 0014                 |
| 011_banana            | 0010                     | 0010                 |
| 019_pitcher_base      | 0009                     | 0041                 |
| 021_bleach_cleanser   | 0008                     | 0006                 |
| 024_bowl              | 0007                     | 0007                 |
| 025_mug               | 0007                     | 0070                 |
| 035_power_drill       | 0010                     | 0010                 |
| 036_wood_block        | 0090                     | 0081                 |
| 037_scissors          | 0010                     | 0016                 |
| 040_large_marker      | 0010                     | 0089                 |
| 051_large_clamp       | 0010                     | 0010                 |
| 052_extra_large_clamp | 0003                     | 0003                 |
| 061_foam_brick        | 0081                     | 0081                 |

Table 1. Reference video sequences selection on the YCB-Video dataset.

### 2. Additional Quantitative Results

#### 2.1. OnePose and OnePose-LowTexture Dataset

We evaluated the performance of our method on the OnePose [7] and OnePose-LowTexture [2] datasets by computing the pose error success rate for different thresholds. Table 2 compares our approach with OnePose++ [2] and

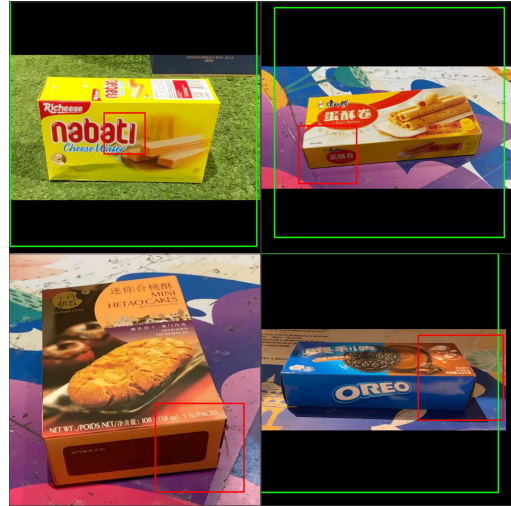

Figure 1. Detection results of Gen6D on the OnePose dataset. The red bounding boxes indicate the Gen6D detection results.

Gen6D [4] under both five-view and ten-view settings—the latter being the minimum number of views required for OnePose++ to reconstruct all objects successfully. Although OnePose++ achieves higher accuracy thanks to its dense matching strategy, it failed to recover most query views, yielding less than 50% accuracy for the 30cm-30deg threshold. For low-texture objects, the 30cm-30deg accuracy dropped to only 10.1%. In contrast, our method demonstrates robustness on both datasets, achieving a higher low-threshold success rate. As for Gen6D, its detection module failed to identify object regions in both datasets (see Fig. 1), highlighting its lack of robustness when query and reference views exhibit minimal scale variations. Even when provided with ground-truth detection results, Gen6D could not deliver satisfactory performance.

#### 2.2. YCB-Video Dataset

In this section, we present detailed quantitative results on the YCB-Video dataset. Table 3 and Table 4 display the performance on the Most-overlapping and Occlusion-minimizing reference databases against Gen6D and OnePose++, respectively. With only five reference views, our method outperforms both baselines in most cases, especially on the Occlusion-minimizing reference database with fewer occluded views, achieving higher accuracy. Although OnePose++ performs well with dense reference views (200 views), its performance still lags behind our method due to incomplete point reconstruction. As for Gen6D, even with dense reference views, its performance

| Ref. images | Method                 | OnePose     |             |             |             |             |             | OnePose-LowTexture |             |             |             |             |             |
|-------------|------------------------|-------------|-------------|-------------|-------------|-------------|-------------|--------------------|-------------|-------------|-------------|-------------|-------------|
|             |                        | 1cm-1deg    | 3cm-3deg    | 5cm-5deg    | 10cm-10deg  | 20cm-20deg  | 30cm-30deg  | 1cm-1deg           | 3cm-3deg    | 5cm-5deg    | 10cm-10deg  | 20cm-20deg  | 30cm-30deg  |
| 5           | OnePose++ <sup>†</sup> | <b>14.8</b> | <b>31.6</b> | 36.4        | 42.8        | 44.9        | 46.3        | <b>0.8</b>         | 2.0         | 2.6         | 4.2         | 7.6         | 10.1        |
|             | Gen6D <sup>†</sup>     | 0.1         | 1.8         | 4.6         | -           | -           | -           | 0.1                | 2.2         | 5.5         | -           | -           | -           |
|             | <b>Ours</b>            | 0.5         | 14.1        | <b>39.3</b> | <b>78.5</b> | <b>91.7</b> | <b>92.9</b> | 0.3                | <b>7.9</b>  | <b>25.2</b> | <b>60.5</b> | <b>83.3</b> | <b>88.8</b> |
| 10          | OnePose++              | <b>40.6</b> | <b>67.7</b> | <b>73.4</b> | 78.8        | 80.7        | 81.4        | <b>8.3</b>         | <b>25.5</b> | <b>34.4</b> | 44.6        | 51.9        | 56.0        |
|             | Gen6D <sup>†</sup>     | 0.1         | 1.9         | 4.9         | -           | -           | -           | 0.2                | 2.5         | 5.7         | -           | -           | -           |
|             | <b>Ours</b>            | 0.7         | 19.0        | 48.4        | <b>81.8</b> | <b>90.6</b> | <b>92.0</b> | 0.3                | 9.3         | 28.3        | <b>67.5</b> | <b>88.0</b> | <b>91.5</b> |

Table 2. **Performance comparison on OnePose and OnePose-LowTexture datasets.** <sup>†</sup> indicates onepose++ have several objects failed to reconstruct and <sup>†</sup> indicates provide ground-truth detection results for Gen6D. The best results are highlighted in **bold**.

remains similar to that under the sparse view setting, highlighting an intrinsic limitation in handling occlusion scenarios.

| Ref. images           | Gen6D <sup>†</sup> |             | OnePose++   |             | Gen6D <sup>‡</sup> |      | Gen6D <sup>†</sup> |             | OnePose++   |             | Ours        |             |
|-----------------------|--------------------|-------------|-------------|-------------|--------------------|------|--------------------|-------------|-------------|-------------|-------------|-------------|
|                       | 25                 | ADD         | 25          | ADD         | 200                | ADD  | 200                | ADD         | 200         | ADD         | 5           | ADD         |
| 002_master_chef_can   | 78.8               | 31.8        | 64.8        | 29.2        | 58.7               | 27.9 | 77.1               | 30.5        | 70.4        | 32.4        | 66.7        | 23.2        |
| 003_cracker_box       | 43.6               | 16.0        | 24.3        | 8.6         | 8.3                | 1.0  | 39.7               | 13.1        | 57.0        | 51.8        | 72.7        | 50.3        |
| 004_sugar_box         | 43.5               | 7.3         | 16.0        | 6.9         | 19.9               | 2.5  | 45.9               | 8.1         | 31.7        | 13.5        | 67.1        | 7.9         |
| 005_tomato_soup_can   | 49.4               | 17.0        | 8.1         | 2.3         | 27.7               | 8.9  | 76.5               | 49.4        | 40.0        | 13.3        | 56.3        | 41.1        |
| 006_mustard_bottle    | 76.1               | 47.6        | 51.6        | 37.1        | 68.7               | 46.0 | 86.6               | 59.4        | 72.3        | 47.3        | 67.8        | 44.3        |
| 007_tuna_fish_can     | <b>87.2</b>        | <b>52.3</b> | 0.4         | 0.1         | 69.0               | 37.8 | 42.4               | 7.3         | 49.0        | 30.7        | 82.2        | 50.1        |
| 008_pudding_box       | 42.8               | 4.2         | 4.1         | 0.5         | 4.8                | 0.6  | <b>64.3</b>        | <b>36.1</b> | 22.4        | 5.5         | 61.2        | 13.3        |
| 009_gelatin_box       | 66.0               | 37.6        | 0.0         | 0.0         | 34.3               | 13.4 | 61.5               | 39.8        | <b>66.7</b> | <b>48.1</b> | 28.1        | 14.8        |
| 010_potted_meat_can   | 61.4               | 36.6        | 41.6        | 30.8        | 51.3               | 31.2 | 37.4               | 25.1        | 64.7        | 49.8        | <b>80.2</b> | <b>61.6</b> |
| 011_banana            | 37.5               | 25.0        | 5.5         | 0.8         | 19.2               | 12.0 | <b>76.8</b>        | 19.8        | 22.2        | 7.5         | 67.0        | <b>48.1</b> |
| 019_pitcher_base      | 76.5               | 18.5        | 27.1        | <b>20.2</b> | 25.7               | 7.7  | 35.8               | 17.4        | 56.9        | 18.9        | <b>86.9</b> | <b>74.1</b> |
| 021_bleach_cleanser   | 36.2               | 18.3        | <b>59.7</b> | <b>41.8</b> | 11.5               | 4.0  | 45.7               | 8.7         | 53.4        | 35.0        | 59.5        | 41.1        |
| 024_bowl              | 46.8               | 7.0         | 12.3        | 1.2         | 12.6               | 2.9  | <b>84.9</b>        | <b>59.7</b> | -           | -           | 44.2        | 3.2         |
| 025_mug               | 83.5               | 63.4        | 6.1         | 1.9         | 79.6               | 54.7 | 33.7               | 7.7         | 61.0        | 37.9        | <b>90.2</b> | <b>79.3</b> |
| 035_power_drill       | 34.2               | 6.4         | 24.3        | <b>14.8</b> | 1.4                | 0.0  | 41.7               | 2.2         | 31.9        | <b>20.4</b> | <b>70.6</b> | <b>52.5</b> |
| 036_wood_block        | <b>41.5</b>        | 2.5         | 0.6         | 0.0         | 5.8                | 0.0  | 21.6               | <b>8.1</b>  | 4.8         | 0.0         | 0.0         | 0.0         |
| 037_scissors          | 21.5               | 7.4         | 0.4         | 0.0         | 4.2                | 2.0  | <b>64.2</b>        | <b>55.1</b> | 14.7        | 5.1         | 24.1        | 10.8        |
| 040_large_marker      | 65.0               | 55.1        | 6.1         | 4.3         | 48.9               | 40.9 | 33.3               | 7.5         | 46.4        | 38.4        | <b>67.5</b> | <b>55.7</b> |
| 051_large_clamp       | 36.0               | 9.1         | 7.7         | 1.1         | 17.4               | 1.8  | 35.7               | 11.1        | 13.9        | 2.4         | <b>56.4</b> | <b>17.1</b> |
| 052_extra_large_clamp | 34.3               | 8.7         | 31.2        | 8.3         | 13.2               | 0.3  | 35.7               | 11.1        | 70.1        | 27.7        | <b>78.2</b> | <b>36.2</b> |
| 061_foam_brick        | 19.3               | 6.5         | 0.1         | 0.0         | 28.3               | 10.4 | 22.1               | 7.3         | 16.3        | 5.2         | <b>56.1</b> | <b>20.1</b> |
| MEAN                  | 51.5               | 22.8        | 18.7        | 10.0        | 29.1               | 14.6 | 51.1               | 22.9        | 43.3        | 24.5        | <b>65.5</b> | <b>35.4</b> |

Table 3. **Performance of the YCB-Video dataset (Most-overlapping).** <sup>†</sup> indicates providing ground-truth detection results for Gen6D, <sup>‡</sup> indicates the background has been masked based on the ground-truth mask to help Gen6D to achieve better performance. We’ve highlighted the **best**, **second-best**, and **third-best** results.

| Ref. images           | Gen6D <sup>†</sup> |            | OnePose++ |             | Gen6D <sup>‡</sup> |             | Gen6D <sup>†</sup> |             | OnePose++   |             | Ours        |             |
|-----------------------|--------------------|------------|-----------|-------------|--------------------|-------------|--------------------|-------------|-------------|-------------|-------------|-------------|
|                       | 25                 | ADD        | 25        | ADD         | 200                | ADD         | 200                | ADD         | 200         | ADD         | 5           | ADD         |
| 002_master_chef_can   | 73.1               | 43.1       | 22.0      | 7.7         | 69.6               | 40.5        | 72.4               | <b>43.7</b> | <b>81.2</b> | 43.3        | 67.8        | 33.2        |
| 003_cracker_box       | 40.9               | 13.9       | 22.0      | 6.3         | 8.4                | 1.0         | 39.7               | 13.1        | 56.8        | <b>50.7</b> | 75.5        | 47.8        |
| 004_sugar_box         | 47.0               | 9.0        | 14.6      | 7.7         | 12.8               | 4.7         | 47.9               | 8.3         | 29.9        | <b>14.8</b> | <b>66.2</b> | 8.6         |
| 005_tomato_soup_can   | 57.6               | 34.8       | 43.6      | 20.7        | 57.0               | 30.7        | 56.3               | 32.9        | 68.4        | 40.6        | <b>80.4</b> | <b>49.5</b> |
| 006_mustard_bottle    | 76.0               | 47.6       | 52.4      | 37.8        | 68.8               | 46.1        | <b>76.5</b>        | <b>49.4</b> | 73.1        | 48.1        | 57.6        | 38.8        |
| 007_tuna_fish_can     | 75.4               | 37.9       | 3.4       | 1.2         | 53.9               | 25.3        | <b>76.4</b>        | <b>38.5</b> | 54.7        | 23.5        | 67.3        | 31.7        |
| 008_pudding_box       | 52.8               | 4.7        | 4.4       | 1.9         | 3.0                | 0.0         | 52.4               | 5.0         | 36.8        | <b>33.4</b> | <b>70.4</b> | <b>47.7</b> |
| 009_gelatin_box       | <b>77.0</b>        | 28.1       | 0.0       | 0.0         | 11.3               | 1.2         | 75.9               | 28.1        | 43.0        | 15.8        | 75.6        | <b>56.1</b> |
| 010_potted_meat_can   | 59.2               | 35.8       | 49.0      | <b>37.4</b> | 44.5               | 29.9        | 58.8               | 35.2        | 64.7        | 49.2        | <b>69.0</b> | <b>51.8</b> |
| 011_banana            | 37.6               | 25.2       | 6.6       | 1.0         | 19.1               | 11.9        | 37.4               | 25.1        | 20.4        | 7.6         | <b>67.5</b> | <b>45.9</b> |
| 019_pitcher_base      | 83.8               | 17.2       | 30.2      | <b>19.9</b> | 29.3               | 10.7        | 83.7               | 16.4        | 54.0        | <b>17.6</b> | <b>85.8</b> | <b>71.9</b> |
| 021_bleach_cleanser   | 62.1               | 34.9       | 45.8      | <b>35.5</b> | 19.1               | 13.2        | 62.4               | 35.0        | 50.2        | 35.1        | <b>64.2</b> | <b>43.5</b> |
| 024_bowl              | 45.3               | 5.7        | 12.2      | 1.4         | 12.6               | 2.9         | <b>45.7</b>        | <b>8.7</b>  | -           | -           | 29.8        | 1.4         |
| 025_mug               | 42.4               | 12.0       | 10.1      | 1.8         | 62.9               | 19.3        | 47.7               | 14.6        | 28.8        | 5.7         | <b>80.5</b> | <b>62.9</b> |
| 035_power_drill       | 34.5               | 6.7        | 23.0      | <b>13.0</b> | 1.4                | 0.0         | 33.7               | 7.7         | 32.6        | <b>20.5</b> | <b>74.6</b> | <b>57.4</b> |
| 036_wood_block        | 24.2               | <b>1.2</b> | 14.0      | 0.0         | 3.6                | 0.0         | 20.6               | 0.6         | 20.4        | 0.0         | 57.3        | 0.5         |
| 037_scissors          | 37.2               | 18.2       | 0.3       | 0.0         | 1.9                | 0.8         | 34.0               | 15.9        | 5.4         | 0.9         | 46.0        | 24.3        |
| 040_large_marker      | <b>35.0</b>        | 19.7       | 0.4       | 0.1         | 22.0               | 6.1         | 42.1               | 20.9        | 16.1        | 10.3        | <b>48.2</b> | <b>39.0</b> |
| 051_large_clamp       | 37.1               | 9.7        | 8.4       | 1.1         | 17.4               | 1.8         | 33.3               | 7.5         | 12.9        | 2.3         | <b>58.7</b> | <b>18.8</b> |
| 052_extra_large_clamp | 35.4               | 9.4        | 39.4      | <b>12.4</b> | 13.2               | 0.2         | 35.7               | 11.1        | 69.1        | 27.3        | <b>72.2</b> | <b>33.2</b> |
| 061_foam_brick        | 20.0               | 6.4        | 0.1       | 0.0         | <b>28.3</b>        | <b>10.5</b> | 22.1               | 7.3         | 16.1        | 5.1         | 14.6        | 2.3         |
| MEAN                  | 50.2               | 20.1       | 19.1      | 11.3        | 26.7               | 12.2        | 50.2               | 20.2        | 41.7        | 22.6        | <b>66.9</b> | <b>37.8</b> |

Table 4. **Performance of the YCB-Video dataset (Occlusion-minimizing).** <sup>†</sup> indicates providing ground-truth detection results for Gen6D, <sup>‡</sup> indicates the background has been masked based on the ground-truth mask to help Gen6D to achieve better performance. We’ve highlighted the **best**, **second-best**, and **third-best** performance.

## 2.3. LINEMOD and Occluded LINEMOD Dataset

This section provides a detailed comparison of results on the LINEMOD [3] dataset. As shown in Table 6, our method outperforms baselines when using only five reference views. Under the 25-reference setting, our method surpasses OnePose++ in most cases and achieves comparable performance with Gen6D<sup>†</sup>, which benefits from ground-truth detection results and was trained on a different subset of LINEMOD objects. Additionally, our method performs on par with BB8 [6], an instance-level method that must be trained for each specific object.

Furthermore, Table 5 presents additional results on the Occluded LINEMOD [1] dataset, including performance with dense reference views for Gen6D and OnePose++. Despite using dense reference views, both Gen6D and OnePose++ perform poorly in occluded scenarios.

| Ref. images | Method             | Objects     |      |      |         |      |         |       |             | Avg. |
|-------------|--------------------|-------------|------|------|---------|------|---------|-------|-------------|------|
|             |                    | ape         | can  | cat  | driller | duck | eggbox* | glue* | holepuncher |      |
|             |                    | ADD(s)-0.1d |      |      |         |      |         |       |             |      |
| 25          | Ours               | 21.7        | 61.6 | 54.7 | 53.1    | 30.4 | 27.6    | 57.5  | 41.9        | 43.6 |
| Full        | OnePose++          | 0.0         | 0.0  | 2.7  | 0.0     | 4.2  | 43.8    | 20.0  | 19.1        | 11.2 |
|             | Gen6D              | 14.9        | 29.6 | 9.6  | 4.2     | 20.2 | 23.9    | 16.2  | 36.4        | 19.4 |
|             | Gen6D <sup>†</sup> | 17.4        | 36.5 | 12.7 | 25.6    | 21.5 | 40.4    | 34.7  | 44.9        | 29.2 |
| Proj-2d@5px |                    |             |      |      |         |      |         |       |             |      |
| 25          | Ours               | 59.7        | 58.9 | 54.7 | 27.8    | 56.3 | 1.9     | 53.6  | 71.4        | 47.9 |
| Full        | OnePose++          | 0.0         | 0.0  | 9.3  | 0.0     | 9.2  | 22.2    | 0.0   | 28.3        | 8.6  |
|             | Gen6D              | 43.4        | 38.9 | 29.7 | 4.3     | 46.3 | 4.0     | 12.5  | 57.0        | 29.5 |
|             | Gen6D <sup>†</sup> | 57.9        | 51.0 | 41.9 | 21.2    | 52.4 | 5.0     | 34.6  | 73.7        | 42.2 |

Table 5. **Additional results on Occluded LINEMOD.** Metrics ADD(s)-0.1d and Proj-2d@5px are reported. <sup>†</sup> indicates that Gen6D was provided with ground-truth detection results, and objects in *italic* are included in the Gen6D training set. The **best** results are highlighted.

## 3. More Analysis

### 3.1. Advantages of Bounding Box Corner Representation

In this section, we present an additional comparison of different object pose representations. Specifically, we compare the box corner heatmap representation with the ray representation under Plücker coordinate [5] and the vector pose representation. For the vector pose, we adopt the 6D representation [10] for the rotation and a 3D translation and additionally include the principal point (2D) and

| Ref. images | Method             | Objects |           |      |      |      |         |      |         |       |             |      |      |       | Avg. |
|-------------|--------------------|---------|-----------|------|------|------|---------|------|---------|-------|-------------|------|------|-------|------|
|             |                    | ape     | benchwise | cam  | can  | cat  | driller | duck | eggbox* | glue* | holepuncher | iron | lamp | phone |      |
| ADD(s)-0.1d |                    |         |           |      |      |      |         |      |         |       |             |      |      |       |      |
| 5           | OnePose++          | -       | 0.0       | 0.0  | 2.0  | 0.0  | 3.3     | -    | -       | -     | 0.0         | 2.7  | 1.9  | 1.0   | -    |
|             | Gen6D              | -       | 24.4      | 21.6 | -    | 17.8 | 14.8    | 11.6 | 51.8    | 32.5  | -           | -    | 41.4 | -     | -    |
|             | Gen6D <sup>†</sup> | -       | 39.0      | 26.1 | -    | 22.8 | 32.6    | 15.2 | 71.4    | 40.2  | -           | -    | 51.6 | -     | -    |
|             | Ours               | 33.1    | 81.0      | 44.0 | 68.6 | 41.9 | 69.8    | 21.9 | 89.0    | 60.3  | 15.4        | 45.3 | 60.1 | 37.0  | 51.3 |
| 25          | OnePose++          | 6.3     | 74.0      | 57.0 | 44.3 | 25.2 | 70.1    | 16.5 | 96.8    | 21.5  | 25.4        | 70.4 | 76.0 | 39.5  | 47.9 |
|             | Gen6D              | -       | 75.1      | 60.2 | -    | 59.1 | 61.4    | 37.2 | 66.6    | 47.0  | -           | -    | 86.6 | -     | -    |
|             | Gen6D <sup>†</sup> | -       | 83.9      | 65.8 | -    | 59.8 | 83.5    | 46.8 | 96.9    | 82.9  | -           | -    | 92.9 | -     | -    |
|             | Ours               | 31.6    | 86.6      | 66.1 | 81.0 | 49.8 | 82.9    | 43.9 | 83.8    | 90.0  | 50.0        | 67.2 | 85.1 | 58.1  | 67.4 |
| BB8         |                    | 40.4    | 91.8      | 55.7 | 64.1 | 62.6 | 74.4    | 44.3 | 57.8    | 41.2  | 67.2        | 84.7 | 76.5 | 54.0  | 62.7 |
| PVNet       |                    | 43.6    | 99.9      | 86.9 | 95.5 | 79.3 | 96.4    | 52.6 | 99.2    | 95.7  | 81.9        | 98.9 | 99.3 | 92.4  | 86.3 |
| Proj-2d@5px |                    |         |           |      |      |      |         |      |         |       |             |      |      |       |      |
| 5           | OnePose++          | -       | 0.0       | 0.0  | 1.7  | 0.0  | 2.6     | -    | -       | -     | 0.0         | 1.5  | 1.4  | 2.4   | -    |
|             | Gen6D              | -       | 23.1      | 29.5 | -    | 33.4 | 15.7    | 29.5 | 33.0    | 38.2  | -           | -    | 36.6 | -     | -    |
|             | Gen6D <sup>†</sup> | -       | 36.1      | 36.3 | -    | 42.0 | 34.5    | 37.8 | 39.6    | 54.1  | -           | -    | 46.2 | -     | -    |
|             | Ours               | 66.6    | 45.8      | 35.7 | 47.3 | 57.1 | 25.6    | 61.9 | 72.3    | 54.5  | 39.3        | 21.9 | 19.8 | 19.9  | 43.8 |
| 25          | OnePose++          | 35.2    | 86.4      | 90.4 | 75.1 | 58.2 | 75.5    | 58.2 | 92.3    | 26.8  | 55.4        | 79.8 | 80.1 | 65.5  | 67.6 |
|             | Gen6D              | -       | 78.4      | 84.8 | -    | 65.2 | 77.3    | 92.3 | 92.0    | 98.0  | -           | -    | 94.5 | -     | -    |
|             | Gen6D <sup>†</sup> | -       | 90.1      | 92.9 | -    | 96.5 | 91.7    | 94.4 | 90.9    | 95.6  | -           | -    | 93.7 | -     | -    |
|             | Ours               | 96.0    | 71.1      | 81.6 | 90.0 | 96.0 | 66.3    | 97.1 | 87.3    | 98.6  | 95.2        | 60.0 | 67.6 | 69.1  | 82.9 |
| BB8         |                    | 96.6    | 90.1      | 86.0 | 91.2 | 98.8 | 80.9    | 92.2 | 91.0    | 92.3  | 95.3        | 84.8 | 75.8 | 85.3  | 89.3 |
| PVNet       |                    | 99.2    | 99.8      | 99.2 | 99.9 | 99.3 | 96.9    | 98.0 | 99.3    | 98.6  | 100.0       | 99.2 | 98.3 | 99.4  | 99.0 |

Table 6. **Additional comparison on the LINEMOD dataset** <sup>†</sup> indicates provide ground-truth detection results for Gen6D. We’ve highlighted the **best**, **second-best**, and **third-best** results.

focal length (1D) as inputs to the network—resulting in an 12-dimensional vector. For the Plücker ray, our implementation is based on the source code from Camera as Rays [9]. Regardless of the representation, the same decoder architecture is used; the primary differences lie in the input and output projection layers.

All experiments were conducted on the OnePose dataset, and we report the pose error success rate using a threshold of 5 cm and 5°. The networks for each representation were trained exclusively on the OnePose training set for 100 epochs. Ten reference views were used in the inference phase.

|          | Vector Pose | Plücker Ray | Box Corner Heatmap |
|----------|-------------|-------------|--------------------|
| 5cm-5deg | 28.9        | 33.3        | <b>50.4</b>        |

Table 7. **Performance of different regression target representations.** Best result is shown in **bold**.

As shown in Table 7, the box corner heatmap representation outperforms the other two methods. This result highlights its key advantage: it is independent of camera intrinsic parameters and is well-suited for learning by vision transformers.

### 3.2. Sparse-View Advantage Attribution

To investigate the source of BoxDreamer’s sparse-view advantage, we conduct ablation experiments comparing it

with OnePose++ under different 3D reconstruction settings. As shown in Fig. 2, DUST3R produces denser but noisier point clouds, while DetectorFreeSfM yields sparser and cleaner reconstructions. We evaluate both methods using the same reconstruction input and reference views on LINEMOD and Occluded LINEMOD.

The results (see Table 8) indicate that increasing the point cloud density using DUST3R does not yield substantial performance gains for OnePose++. This is likely due to the increased noise in denser reconstructions, which can adversely impact pose estimation accuracy. By contrast, BoxDreamer consistently outperforms OnePose++ across all tested settings.

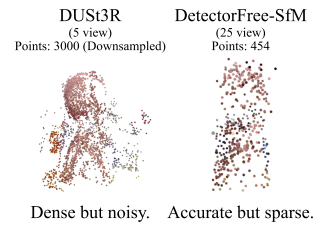

Figure 2. Visualization of point clouds reconstructed by DUST3R and DetectorFreeSfM.

These findings demonstrate that the robustness of BoxDreamer to sparse-view conditions is primarily attributed to its bounding box-based design, rather than to the specific choice of 3D reconstruction method.

| Method      | Reconstruction Method | Ref. views | Occ-LM             | LINEMOD            |
|-------------|-----------------------|------------|--------------------|--------------------|
|             |                       |            | ADD(s)/Proj2D      | ADD(s)/Proj2D      |
| OnePose++   | DUST3R                | 5          | 1.3 / 0.0          | 7.3 / 7.9          |
|             | DetectorFreeSfM       | 25         | 3.8 / 3.1          | 47.9 / 67.6        |
| <b>Ours</b> | DUST3R                | 5          | <b>29.8 / 21.9</b> | <b>51.3 / 43.8</b> |
|             | DetectorFreeSfM       | 25         | <b>43.6 / 47.9</b> | <b>66.5 / 81.8</b> |

Table 8. **Ablation study on the source of sparse-view advantage.** We compare OnePose++ and BoxDreameer under different 3D reconstruction methods and reference views. The best results are highlighted in **bold**.

### 3.3. Failure Cases

Due to intrinsic ambiguities in the rotation of fully symmetric objects, our method may sometimes fail to predict the correct orientation. As shown in Fig. 3, our method incorrectly estimates the rotation for a symmetric object. Notably, both OnePose++ and Gen6D exhibit similar failures in such cases.

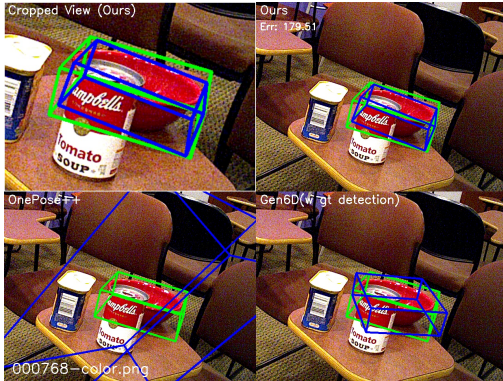

Figure 3. **Failure with symmetric objects.** BoxDreameer, along with OnePose++ and Gen6D, fails to predict the correct rotation for a fully symmetric object.

In another scenario, our method struggles with extreme lighting changes that significantly alter the object’s surface color. As illustrated in Fig. 4, the disparity between the reference and target object colors leads to inaccurate pose predictions.

In addition to the analysis above, we further clarify the dependency of BoxDreameer on the 3D reconstruction stage. Similar to other methods that rely on 3D reference models, BoxDreameer cannot regress accurate bounding boxes if the underlying reconstruction fails. In other words, when the reconstruction stage fails to generate a valid reference model, BoxDreameer will inevitably fail as well. However, a key advantage of our approach is that BoxDreameer significantly reduces the dependency on the number of reference images required for successful reconstruction.

In all our experiments, we observe that DUST3R is able to successfully reconstruct all objects with as few as 5 ref-

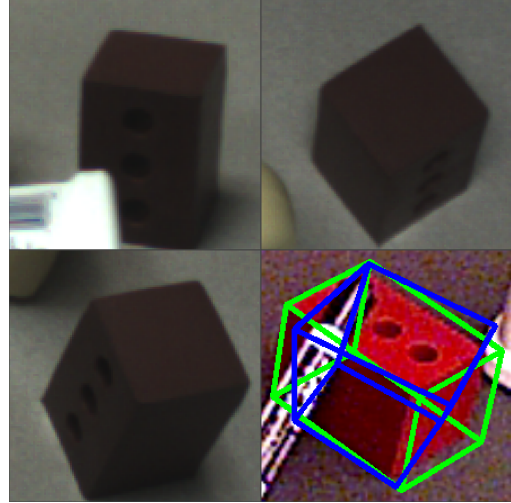

Figure 4. **Failure under extreme lighting changes.** The bottom right shows the predicted object pose, while the other panels display the reference views. The significant color differences caused by lighting variations lead to incorrect pose estimation.

erence images. This enables BoxDreameer to achieve robust pose estimation even under sparse reference conditions. To further quantify this, we summarize in Table 9 the reconstruction success rate using only 2 reference images, the minimum number of images required for successful reconstruction on each dataset, and the corresponding pose estimation performance under this minimal setting.

| Dataset   | 2-View Reconstruction Success Rate (%) | Min. Imgs Req. | Performance (Min. Reconstruction) |
|-----------|----------------------------------------|----------------|-----------------------------------|
| LMO       | 38.46% (5/13)                          | 4              | 24.8 (ADD-0.1d)                   |
| YCB-V     | 66.67% (14/21)                         | 4              | 31.9 / 54.9 (ADD-AUC / ADDs-AUC)  |
| OnePose-L | 92.50% (37/40)                         | 3              | 53.94 (ADD-0.1d)                  |

Table 9. For each dataset, we report the DUST3R reconstruction success rate with 2 reference images, the minimum number of images required for successful reconstruction, and corresponding BoxDreameer performance.

As shown in the table, although the reconstruction success rate with only 2 images varies across datasets, the number of images required for reliable reconstruction remains low (3-4 images for most cases). Even under such minimal settings, BoxDreameer still achieves competitive performance.

## References

- [1] Eric Brachmann, Alexander Krull, Frank Michel, Stefan Gumhold, Jamie Shotton, and Carsten Rother. Learning 6d object pose estimation using 3d object coordinates. In *Computer Vision—ECCV 2014: 13th European Conference, Zurich, Switzerland, September 6-12, 2014, Proceedings, Part II 13*, pages 536–551. Springer, 2014. 2
- [2] Xingyi He, Jiaming Sun, Yuang Wang, Di Huang, Hujun Bao, and Xiaowei Zhou. Onepose++: Keypoint-free one-



- shot object pose estimation without CAD models. In *Advances in Neural Information Processing Systems*, 2022. 1
- [3] Stefan Hinterstoisser, Vincent Lepetit, Slobodan Ilic, Stefan Holzer, Gary Bradski, Kurt Konolige, and Nassir Navab. Model based training, detection and pose estimation of texture-less 3d objects in heavily cluttered scenes. In *Asian conference on computer vision*, pages 548–562. Springer, 2012. 2
  - [4] Yuan Liu, Yilin Wen, Sida Peng, Cheng Lin, Xiaoxiao Long, Taku Komura, and Wenping Wang. Gen6d: Generalizable model-free 6-dof object pose estimation from rgb images. In *ECCV*, 2022. 1
  - [5] Bruce D Lucas and Takeo Kanade. An iterative image registration technique with an application to stereo vision. In *IJCAI’81: 7th international joint conference on Artificial intelligence*, pages 674–679, 1981. 2
  - [6] Mahdi Rad and Vincent Lepetit. Bb8: A scalable, accurate, robust to partial occlusion method for predicting the 3d poses of challenging objects without using depth. In *Proceedings of the IEEE international conference on computer vision*, pages 3828–3836, 2017. 2
  - [7] Jiaming Sun, Zihao Wang, Siyu Zhang, Xingyi He, Hongcheng Zhao, Guofeng Zhang, and Xiaowei Zhou. OnePose: One-shot object pose estimation without CAD models. *CVPR*, 2022. 1
  - [8] Yu Xiang, Tanner Schmidt, Venkatraman Narayanan, and Dieter Fox. Posecnn: A convolutional neural network for 6d object pose estimation in cluttered scenes. 2018. 1
  - [9] Jason Y Zhang, Amy Lin, Moneish Kumar, Tzu-Hsuan Yang, Deva Ramanan, and Shubham Tulsiani. Cameras as rays: Pose estimation via ray diffusion. In *International Conference on Learning Representations (ICLR)*, 2024. 3
  - [10] Yi Zhou, Connelly Barnes, Jingwan Lu, Jimei Yang, and Hao Li. On the continuity of rotation representations in neural networks. *2019 IEEE/CVF Conference on Computer Vision and Pattern Recognition (CVPR)*, pages 5738–5746, 2018. 2
